# Supplementary material for: Influence of Cu induced crystallographic disorder on the optical and lattice vibrational properties of ZnO nanoparticles
Source: Royal Society of Chemistry journal article supplement (doi:10.1039/d3cp02015k), 2023-01-01
Supplement: d3cp02015k1.pdf [file d3cp02015k1.pdf]

Supplementary information

# Influence of Cu induced crystallographic disorder on the optical and lattice vibrational properties of ZnO nanoparticles

Md. Abdullah Zubair<sup>1\*</sup>, Tasnim Kamal Mouri<sup>2</sup>, Mohammed Tareque Chowdhury<sup>3</sup>

*<sup>1</sup>Department of Nanomaterials and Ceramic Engineering, Bangladesh University of  
Engineering and Technology (BUET), Dhaka – 1000, Bangladesh*

*<sup>2</sup>Institute of Energy Conversion and Department of Materials Science and Engineering,  
University of Delaware, Newark, DE 19716, USA*

*<sup>3</sup>Institute of Energy Science, Atomic Energy Research Establishment, Bangladesh  
Atomic Energy Commission (BAEC), Dhaka – 1000, Bangladesh*

\*Corresponding Author Email: [mazubair2017@gmail.com](mailto:mazubair2017@gmail.com) (M. A. Zubair)

**Supplementary note 1:**

Table S1. Observed vibrational frequencies of different modes in 400°C annealed nanoparticles [1-5]

| Vibrational frequency (cm <sup>-1</sup> ) | Vibrational mode                                              |
|-------------------------------------------|---------------------------------------------------------------|
| ~3400 – 3500                              | O – H stretching                                              |
| ~2925                                     | –CH <sub>2</sub> – stretching                                 |
| ~2850                                     | –CH <sub>3</sub> – stretching                                 |
| ~2340                                     | CO <sub>2</sub> molecule                                      |
| ~1650 – 1550                              | H–O–H bending                                                 |
|                                           | C – O symmetric & asymmetric bending                          |
|                                           | Amino (–NH <sub>2</sub> ) group                               |
| ~1390                                     | COO <sup>-</sup> symmetric stretching from metal (Zn) complex |
| 1465, 1422 – 1350                         | –CH <sub>2</sub> – bending                                    |
| 1470 – 1430                               | –CH <sub>3</sub> – asymmetric                                 |
| ~1000 – 1100                              | Zn – OH stretching and deformation                            |
|                                           | – CO stretching                                               |
|                                           | Other organic groups with Zn-hydroxy-acetate                  |
| ~680                                      | Cu – Zn – O stretching                                        |
| ~400 – 500                                | Zn – O stretching                                             |

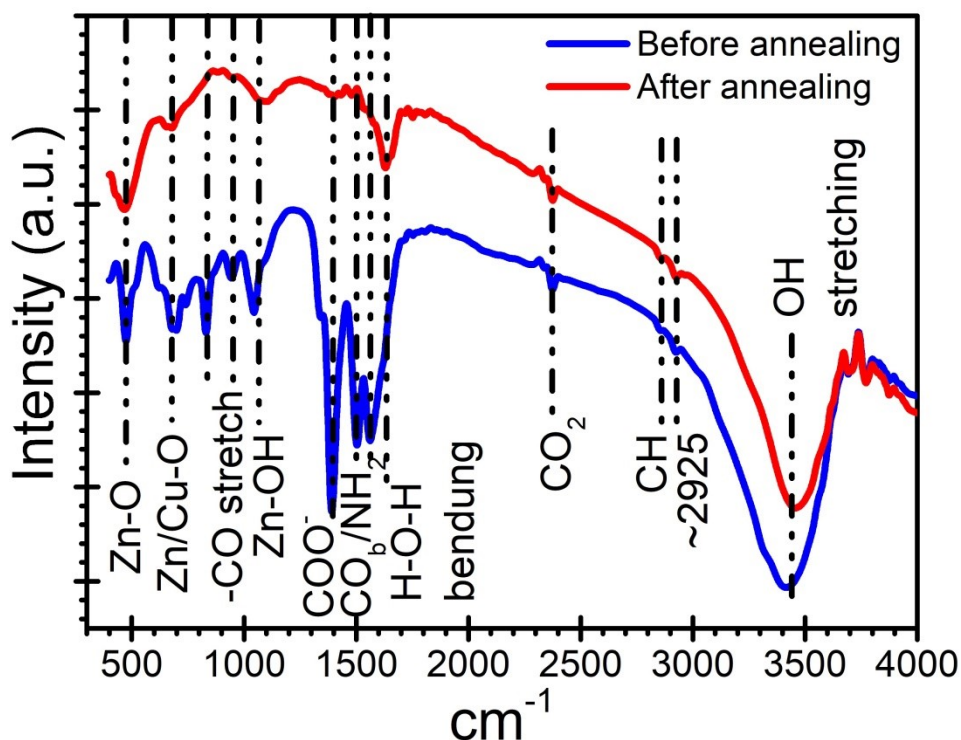

Fig. S1. A comparison between the typical FTIR spectra of 5% Cu incorporated ZnO before and after annealing, exhibiting strong suppression of associate with various complex forming organic group and hydroxyl group after annealing the dry precursor at 400°C, leading to formation and enrichment of oxide phase. Similar type of noticeable suppression in absorption spectra has been observed for other samples. (Here, CO<sub>b</sub> corresponds to symmetric and asymmetric vibration of CO)

**Supplementary note 2:**

Table. S2. EDX standard-less semi-quantitative elemental composition data

|            | EDX elemental composition in mass% with standard deviation |            |            |            |
|------------|------------------------------------------------------------|------------|------------|------------|
|            | Cu                                                         | Zn         | O          | C          |
| ZnO        | -                                                          | 73.5 ± 2.9 | 14.8 ± 1.9 | 10.3 ± 3.7 |
| 3% Cu_ZnO  | 1.8 ± 0.6                                                  | 70.9 ± 2.6 | 17.7 ± 1.4 | 9.2 ± 2.5  |
| 5% Cu_ZnO  | 2.9 ± 0.8                                                  | 71.3 ± 2.3 | 19.9 ± 1.8 | 5.9 ± 2.9  |
| 10% Cu_ZnO | 6.5 ± 0.5                                                  | 70.1 ± 2.9 | 21.2 ± 1.7 | 4.8 ± 2.7  |

**Supplementary note 3:**Table. S3. Occupancy, atomic fractional coordinates and  $B_{iso}$  from Rietveld data

| Atom      | wyck | S.O.F*   | x        | y        | z         | $B/10^4 \text{ pm}^2$ |
|-----------|------|----------|----------|----------|-----------|-----------------------|
| ZnO       |      |          |          |          |           |                       |
| O         | 2b   | 0.980000 | 0.333333 | 0.666667 | 0.3812(3) | 0.7(1)                |
| Zn        | 2b   | 1.000000 | 0.333333 | 0.666667 | 0.000000  | 0.29(2)               |
| 3%Cu_ZnO  |      |          |          |          |           |                       |
| O         | 2b   | 0.980000 | 0.333333 | 0.666667 | 0(1)      | 0.8(3)                |
| Zn        | 2b   | 0.970000 | 0.333333 | 0.666667 | 0.000000  | 0.6(2)                |
| Cu        | 2b   | 0.030000 | 0.333333 | 0.666667 | 0.000000  | 0.6(3)                |
| 5%Cu_ZnO  |      |          |          |          |           |                       |
| O         | 2b   | 0.995000 | 0.333333 | 0.666667 | 0(2)      | 0.6(5)                |
| Zn        | 2b   | 0.950000 | 0.333333 | 0.666667 | 0.000000  | 0.7(4)                |
| Cu        | 2b   | 0.050000 | 0.333333 | 0.666667 | 0.000000  | 0.5(4)                |
| 10%Cu_ZnO |      |          |          |          |           |                       |
| O         | 2b   | 1.000000 | 0.333333 | 0.666667 | 0.4(2)    | 0.7(2)                |
| Zn        | 2b   | 0.900000 | 0.333333 | 0.666667 | 0.000000  | 0.3(3)                |
| Cu        | 2b   | 0.100000 | 0.333333 | 0.666667 | 0.000000  | 0.3(2)                |

\*S.O.F: Site occupancy factor (fixed for Zn/Cu site in this report)

**Supplementary note 4:**

Table S4. Crystallographic parameters extracted from different models for X-ray line broadening analysis

| Sample ID                                      | ZnO                      | 3%Cu ZnO                 | 5%Cu ZnO                  | 10%Cu ZnO                 |
|------------------------------------------------|--------------------------|--------------------------|---------------------------|---------------------------|
| Williamson Hall , UDM                          |                          |                          |                           |                           |
| $D$ (nm)                                       | 55.46                    | 20.39                    | 22.00                     | 20.09                     |
| $\langle \varepsilon \rangle$                  | $1.40 \times 10^{-3}$    | $1.50 \times 10^{-3}$    | $2.20 \times 10^{-3}$     | $2.40 \times 10^{-3}$     |
| $\ast \vartheta$ (cm <sup>-2</sup> )           | $3.25 \times 10^{10}$    | $2.40 \times 10^{11}$    | $2.06 \times 10^{11}$     | $2.47 \times 10^{11}$     |
| R <sup>2</sup>                                 | 0.9996                   | 0.9995                   | 0.9996                    | 0.9949                    |
| Williamson Hall, USDM                          |                          |                          |                           |                           |
| $D$ (nm)                                       | 51.35                    | 19.65                    | 21.01                     | 18.99                     |
| $\sigma$ (MPa)                                 | 162                      | 178                      | 253.3                     | 271.67                    |
| $\ast \ast \langle \varepsilon \rangle_{avg.}$ | $1.30(7) \times 10^{-3}$ | $1.42(8) \times 10^{-3}$ | $2.03(12) \times 10^{-3}$ | $2.17(12) \times 10^{-3}$ |
| $\vartheta$ (cm <sup>-2</sup> )                | $3.79 \times 10^{10}$    | $2.58 \times 10^{11}$    | $2.26 \times 10^{11}$     | $2.77 \times 10^{11}$     |
| R <sup>2</sup>                                 | 0.9771                   | 0.9771                   | 0.9971                    | 0.9749                    |
| Williamson Hall, UDEDM                         |                          |                          |                           |                           |
| $D$ (nm)                                       | 53.32                    | 19.97                    | 21.66                     | 19.52                     |
| $\ddagger \sigma_{avg.}$ (MPa)                 | 170(5)                   | 187(6)                   | 266 (8)                   | 285(9)                    |
| $\langle \varepsilon \rangle_{avg.}$           | $1.35(4) \times 10^{-3}$ | $1.49(4) \times 10^{-3}$ | $2.12(6) \times 10^{-3}$  | $2.27(7) \times 10^{-3}$  |
| $u$ (J/m <sup>3</sup> )                        | $1.15 \times 10^5$       | $1.39 \times 10^5$       | $2.81 \times 10^5$        | $3.23 \times 10^5$        |
| $\vartheta$ (cm <sup>-2</sup> )                | $3.51 \times 10^{10}$    | $2.50 \times 10^{11}$    | $2.13 \times 10^{11}$     | $2.62 \times 10^{11}$     |
| R <sup>2</sup>                                 | 0.9937                   | 0.9937                   | 0.9921                    | 0.9903                    |
| Size-Strain Plot (SSP)                         |                          |                          |                           |                           |
| $D$ (nm)                                       | 42.01                    | 17.71                    | 18.24                     | 16.50                     |
| $\langle \varepsilon \rangle$                  | $6.32 \times 10^{-3}$    | $9.15 \times 10^{-3}$    | $1.09 \times 10^{-2}$     | $1.26 \times 10^{-2}$     |
| $\vartheta$ (cm <sup>-2</sup> )                | $3.52 \times 10^{10}$    | $3.18 \times 10^{11}$    | $3.00 \times 10^{11}$     | $3.67 \times 10^{11}$     |
| R <sup>2</sup>                                 | 0.9995                   | 0.9999                   | 0.9993                    | 0.9990                    |
| Approximation model                            |                          |                          |                           |                           |
| $D$ (nm)                                       | 49.58                    | 19.00                    | 22.06                     | 20.65                     |
| $\langle \varepsilon \rangle$                  | $1.56 \times 10^{-3}$    | $1.88 \times 10^{-3}$    | $2.87 \times 10^{-3}$     | $3.26 \times 10^{-3}$     |
| $\vartheta$ (cm <sup>-2</sup> )                | $4.06 \times 10^{10}$    | $2.76 \times 10^{11}$    | $2.05 \times 10^{11}$     | $2.34 \times 10^{11}$     |

$\ast \vartheta = 1/D^2$  is the dislocation line density,  $\ast \ast \langle \varepsilon \rangle_{avg.}$  is the crystallographic average of micro-strain,  $\ddagger \sigma_{avg.}$  is the crystallographic average of stress.

Supplementary note 5:

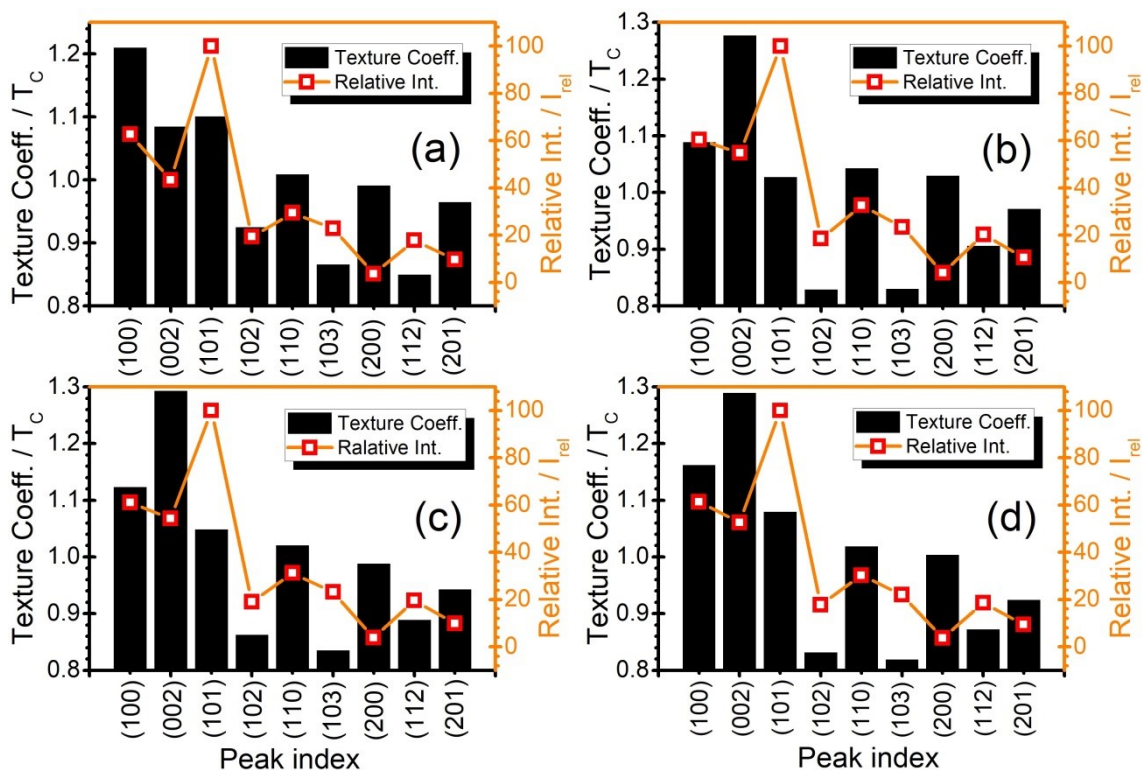

Fig. S2. Variation in Texture coefficient and relative peak intensity of the  $(hkl)$  diffraction planes for (a) ZnO (B) 3%Cu\_ZnO (c) 5%Cu\_ZnO and (d) 10%Cu\_ZnO nanoparticles

The texture coefficient ( $T_C$ ) of the individual crystallographic planes given in Table S2 above has been calculated using the equation given by [6]:

$$T_C = \frac{I_i(hkl)}{I_{oi}(hkl)} \times \left[ (N^{-1}) \times \sum_{i=1}^N \frac{I_i(hkl)}{I_{oi}(hkl)} \right]^{-1} \quad (1)$$

Where,  $I_i(hkl)$  the measured intensity of the  $i^{\text{th}}$   $hkl$  plane,  $I_{oi}(hkl)$  is the standard intensity of the  $i^{\text{th}}$   $hkl$  plane and  $N$  is the number of reflections. Here the values of  $I_{oi}(hkl)$  were obtained from ICDD 01-080-3003 reference pattern.

Supplementary note 6:

## Supplementary information

Table. S5. Data for crystallite size and micro-strain calculation adopting the approximation method

| Sample ID                     | ZnO                    | 3%Cu_ZnO               | 5%Cu_ZnO               | 10%Cu_ZnO               |
|-------------------------------|------------------------|------------------------|------------------------|-------------------------|
| $2\theta_{100}(\circ)$        | 31.755                 | 31.801                 | 31.772                 | 31.765                  |
| $2\theta_{101}(\circ)$        | 36.242                 | 36.279                 | 36.246                 | 36.240                  |
| $\beta_{100}(\text{rad})$     | $4.213 \times 10^{-3}$ | $8.869 \times 10^{-3}$ | $9.001 \times 10^{-3}$ | $9.812 \times 10^{-3}$  |
| $\beta_{101}(\text{rad})$     | $4.494 \times 10^{-3}$ | $9.231 \times 10^{-3}$ | $9.522 \times 10^{-3}$ | $10.402 \times 10^{-3}$ |
| $\beta_{101}/\beta_{100}$     | 1.066                  | 1.041                  | 1.058                  | 1.060                   |
| $m_{100}/\beta_{100}$         | 0.690                  | 0.855                  | 0.747                  | 0.732                   |
| $n_{101}/\beta_{101}$         | 0.456                  | 0.268                  | 0.395                  | 0.410                   |
| $m_{100}(\text{rad})$         | $2.907 \times 10^{-3}$ | $7.585 \times 10^{-3}$ | $6.723 \times 10^{-3}$ | $7.183 \times 10^{-3}$  |
| $n_{101}(\text{rad})$         | $2.049 \times 10^{-3}$ | $2.474 \times 10^{-3}$ | $3.761 \times 10^{-3}$ | $4.265 \times 10^{-3}$  |
| $D(\text{nm})$                | 49.585                 | 19.006                 | 21.441                 | 20.070                  |
| $\langle \varepsilon \rangle$ | $1.565 \times 10^{-3}$ | $1.887 \times 10^{-3}$ | $2.873 \times 10^{-3}$ | $3.258 \times 10^{-3}$  |

## Supplementary note 7:



Table. S6. Peak shape factors as a function of (*hkl*) plane and Cu content.

| Peak index    | $2\theta_{avg}$ (°) | Shape factor ( $\psi_{hkl}$ ) |          |           |           | Average $\psi_{hkl}$ |
|---------------|---------------------|-------------------------------|----------|-----------|-----------|----------------------|
|               |                     | ZnO                           | 3%Cu_ZnO | 3%Cu_ZnO  | 10%Cu_ZnO |                      |
| (100)         | 31.773              | 0.6549                        | 0.6895   | 0.6808    | 0.6891    | 0.6786(0.0163)       |
| (002)         | 34.387              | 0.6551                        | 0.6881   | 0.6807    | 0.6890    | 0.6782(0.0158)       |
| (101)         | 36.251              | 0.6552                        | 0.6871   | 0.6806    | 0.6890    | 0.6780(0.0156)       |
| (102)         | 47.524              | 0.6562                        | 0.6834   | 0.6803    | 0.6889    | 0.6772(0.0144)       |
| (110)         | 56.619              | 0.6573                        | 0.6823   | 0.6802    | 0.6889    | 0.6772(0.0137)       |
| (103)         | 62.828              | 0.6582                        | 0.6822   | 0.6801    | 0.6889    | 0.6774(0.0133)       |
| (200)         | 66.408              | 0.6588                        | 0.6824   | 0.6801    | 0.6890    | 0.6776(0.0131)       |
| (112)         | 67.957              | 0.6589                        | 0.6825   | 0.6801    | 0.6889    | 0.6776(0.0131)       |
| (201)         | 69.115              | 0.6592                        | 0.6826   | 0.6801    | 0.6890    | 0.6777(0.0129)       |
| $\psi_{avg.}$ |                     | 0.657(2)                      | 0.684(3) | 0.6804(3) | 0.6889(6) |                      |

**Supplementary note 8:**

## Supplementary information

Table. S7. Variation in Raman mode intensity (I) ratios given by:  $E_1(\text{LO})/E_2(\text{high})$  and  $2\text{LO}/\text{LO}$  with respect to crystallite size and Cu content

| Sample ID | $E_1(\text{LO})/E_2(\text{high})$ | $2\text{LO}/\text{LO}$ | D (nm) |
|-----------|-----------------------------------|------------------------|--------|
| ZnO       | 0.2675 (0.0108)                   | 2.40 (0.501)           | 53.4   |
| 3%Cu_ZnO  | 0.5589 (0.0409)                   | 0.844 (0.087)          | 20.5   |
| 5%Cu_ZnO  | 0.4995 (0.0336)                   | 0.748 (0.071)          | 21.5   |

Table. S8. Pearson IV profile parameters

| Sample ID | Shape parameter (m) | Left width at half maxima ( $L_w$ ) | Right width at half maxima ( $R_w$ ) | Asymmetry $L_w/R_w$ |
|-----------|---------------------|-------------------------------------|--------------------------------------|---------------------|
| ZnO       | 14.4                | 11.4542                             | 8.5972                               | 1.3323              |
| 3%Cu_ZnO  | 17.3                | 8.9086                              | 7.2438                               | 1.2298              |
| 5%Cu_ZnO  | 25.1                | 8.3465                              | 6.6920                               | 1.2472              |

## References:

## Supplementary information

1. K. Vidhya, M. Saravanan, G. Bhoopathi, V. P. Devarajan, S. Subanya, *Appl. Nanosci.*, 2015, 5, 235–243.
2. A. Sangeetha, S. Jaya Seeli, K. P. Bhuvana, M. Abdul Kader, S. K. Nayak, *J. Solgel Sci. Technol.*, 2019, 91, 261–272.
3. S. Muthukumaran, R. Gopalakrishnan, *Opt. Mater.*, 2012, 34, 1946–1953.
4. M. Darroudia, Z. Sabouri, R. K. Oskuee, A. K. Zak, H. Kargar, M. H. N. A. Hamid, *Ceram. Int.*, 2014, 40, 4827–4831.
5. M. S. Corobea, A. M. Stoenescu, M. Miculescu, V. Raditoiu, R. C. Fierascu, I. Sirbu, Z. Vuluga, S. I. Voicu, *Dig. J. Nanomater. Biostructures*, 2014, 9, 1339 – 1347.
6. M. A. Zubair, M. T. Chowdhury, M. S. Bashar, M. A. Sami and M. F. Islam, *AIP Advances*, 2019, 9, 045123
